# Supplementary material for: Pulmonary exacerbations in early cystic fibrosis lung disease are marked by strong modulation of CD3 and PD-1 on luminal T cells
Source: Frontiers journal article supplement (doi:10.3389/fimmu.2023.1194253), 2023-09-21
Supplement: Data_Sheet_1.PDF [file Data_Sheet_1.PDF]

## *Supplementary Material*

### **Pulmonary exacerbations in early cystic fibrosis lung disease are marked by strong modulation of CD3 and PD-1 on luminal T cells**

**Vincent D. Giacalone<sup>1,2</sup>, Diego Moncada-Giraldo<sup>1,2</sup>, George L. Silva<sup>1,2</sup>, Justin Hosten<sup>3</sup>, Limin Peng<sup>4</sup>, Lokesh Guglani<sup>1,2§</sup>, Rabindra Tirouvanziam<sup>1,2,3§\*</sup>, on behalf of the IMPEDE-CF Program**

<sup>1</sup>Department of Pediatrics, Emory University, Atlanta, GA, USA

<sup>2</sup>Center for CF and Airways Disease Research, Children's Healthcare of Atlanta, Atlanta, GA, USA

<sup>3</sup>Wallace H. Coulter Department of Biomedical Engineering, Georgia Institute of Technology and Emory University, Atlanta, GA, USA

<sup>4</sup>Department of Biostatistics and Bioinformatics, Emory University School of Public Health, Atlanta, GA, USA.

§ Co-senior authors.

**\* Correspondence:**

Rabindra Tirouvanziam, PhD  
[tirouvanziam@emory.edu](mailto:tirouvanziam@emory.edu)

**Table S1. Sample collection totals.** 39 clinic visits were conducted for collection of blood and/or BAL. Not all samples could be obtained due to logistical or biological limitations.

| Subject     | Blood            |             | BAL               |                 |                |
|-------------|------------------|-------------|-------------------|-----------------|----------------|
|             | Whole blood (mL) | Plasma (mL) | Total volume (mL) | Live leukocytes | Cells/ $\mu$ L |
| 1           | 4.8              | 2           | 3                 | 3.60E+05        | 120            |
| 1, visit 2  |                  |             |                   |                 |                |
| 1, visit 3  | 2.45             | 1           |                   |                 |                |
| 2           | 3.5              | 1.4         | 8.36              | 1.90E+05        | 23             |
| 2, visit 2  | 2.4              | 0.865       |                   |                 |                |
| 2, visit 3  | 3                | 1           |                   |                 |                |
| 3           | 3.2              | 1.7         | 10.5              | 1.50E+06        | 143            |
| 4           |                  |             |                   |                 |                |
| 5           | 3.4              | 1.4         | 4.2               | 4.40E+05        | 105            |
| 6           | 3.5              | 1.8         |                   |                 |                |
| 7           | 3.1              | 1.2         | 2                 | 2.00E+06        | 1000           |
| 7, visit 2  | 4.2              | 2.2         |                   |                 |                |
| 7, visit 3  | 3.5              | 1.7         | 2.7               | 2.00E+04        | 8              |
| 8           | 4.5              | 2.3         | 1.4               | 2.70E+06        | 1929           |
| 9           | 3.5              | 1.5         |                   |                 |                |
| 10          | 2.8              | 1.1         |                   |                 |                |
| 11          | 3.5              | 1.2         | 1.2               | 9.00E+04        | 75             |
| 11, visit 2 | 2.5              | 0.92        |                   |                 |                |
| 11, visit 3 | 3                | 1           |                   |                 |                |
| 12          | 2.5              | 0.9         |                   |                 |                |
| 13          | 3.5              | 1.2         | 2                 | 9.30E+04        | 47             |
| 13, visit 2 | 2.43             | 0.95        | 2.4               | 4.50E+06        | 1875           |
| 13, visit 3 |                  |             |                   |                 |                |
| 14          | 2.5              | 1           |                   |                 |                |
| 15          | 3.6              | 2           | 1.35              | 1.08E+07        | 8000           |
| 16          | 3.4              | 1.3         |                   |                 |                |
| 17          |                  |             |                   |                 |                |
| 17, visit 2 | 2.6              | 1           | 0.35              | 4.20E+05        | 1200           |
| 18          | 2.05             | 1           | 4.45              | 5.00E+05        | 112            |

|             |     |      |      |          |     |
|-------------|-----|------|------|----------|-----|
| 18, visit 2 | 1.3 | 0.6  |      |          |     |
| 19          | 2.8 | 1.34 | 3.19 | 7.20E+05 | 226 |
| 20          | 3.1 | 1.4  |      |          |     |
| 21          | 2.4 | 0.84 |      |          |     |
| 22          | 2.9 | 1.22 | 3.8  | 2.40E+05 | 63  |
| 23          | 2.9 | 1.2  | 3.7  | 5.30E+05 | 143 |
| 23, visit 2 | 3   | 1.15 |      |          |     |
| 24          | 2.8 | 1.9  | 3.2  | 7.30E+05 | 228 |
| 25          | 2.4 | 1.2  |      |          |     |
| 26          | 3   | 1.5  | 3.5  | 1.60E+05 | 46  |

**Table S2. Total assays performed for blood and BAL samples.** Soluble mediator assays and flow cytometry analysis were conducted for blood and BAL samples where indicated by an “X”.

| Subject     | Clinical data | Soluble mediators |               |        | Flow cytometry |           |         |         |
|-------------|---------------|-------------------|---------------|--------|----------------|-----------|---------|---------|
|             |               | Plasma Cytokines  | BAL cytokines | BAL NE | Blood P14      | Blood P15 | BAL P14 | BAL P15 |
| 1           | X             | X                 | X             | X      | X              | X         | X       | X       |
| 1, visit 2  | X             |                   |               |        |                |           |         |         |
| 1, visit 3  | X             | X                 |               |        |                |           |         |         |
| 2           | X             | X                 | X             | X      | X              | X         | X       | X       |
| 2, visit 2  | X             | X                 |               |        | X              | X         |         |         |
| 2, visit 3  | X             | X                 |               |        |                |           |         |         |
| 3           | X             | X                 | X             | X      | X              | X         | X       | X       |
| 4           | X             |                   |               |        |                |           |         |         |
| 5           | X             | X                 | X             | X      | X              | X         | X       | X       |
| 6           | X             | X                 |               |        | X              | X         |         |         |
| 7           | X             |                   | X             | X      | X              | X         | X       | X       |
| 7, visit 2  | X             | X                 |               |        |                |           |         |         |
| 7, visit 3  | X             | X                 | X             | X      | X              | X         |         | X       |
| 8           | X             | X                 | X             | X      | X              | X         | X       | X       |
| 9           | X             | X                 |               |        | X              | X         |         |         |
| 10          | X             | X                 |               |        | X              | X         |         |         |
| 11          | X             | X                 | X             | X      | X              | X         |         | X       |
| 11, visit 2 | X             | X                 |               |        |                | X         |         |         |
| 11, visit 3 | X             | X                 |               |        |                |           |         |         |
| 12          | X             | X                 |               |        | X              | X         |         |         |
| 13          | X             | X                 | X             | X      | X              | X         |         | X       |
| 13, visit 2 | X             | X                 | X             | X      | X              |           |         | X       |
| 13, visit 3 | X             |                   |               |        |                |           |         |         |
| 14          | X             | X                 |               |        | X              | X         |         |         |
| 15          | X             | X                 | X             | X      |                |           |         |         |
| 16          | X             | X                 |               |        | X              | X         |         |         |
| 17          | X             |                   |               |        |                |           |         |         |
| 17, visit 2 | X             | X                 | X             | X      | X              | X         | X       | X       |
| 18          | X             | X                 | X             | X      | X              | X         |         | X       |
| 18, visit 2 | X             | X                 |               |        |                |           |         |         |

|             |   |   |   |   |   |   |   |   |
|-------------|---|---|---|---|---|---|---|---|
| 19          | X | X | X | X |   |   |   | X |
| 20          | X | X |   |   |   | X |   |   |
| 21          | X | X |   |   |   |   |   |   |
| 22          | X | X | X | X | X | X | X | X |
| 23          | X | X | X | X | X | X | X | X |
| 23, visit 2 | X | X |   |   |   |   |   |   |
| 24          | X | X | X | X | X | X | X | X |
| 25          | X | X |   |   | X | X |   |   |
| 26          | X | X | X | X |   |   |   |   |

**Table S3. Flow cytometry staining panels.** Two staining panels of 10 colors each were designed and used for the duration of this study. Each panel contained a set of common backbone parameters in addition to three channels with panel-specific parameters.

| Color                  | Stain                   | Vendor            | Catalog        | Clone     |
|------------------------|-------------------------|-------------------|----------------|-----------|
| <b><u>Backbone</u></b> |                         |                   |                |           |
| PB                     | Calcein violet          | Thermo Fisher     | C34858         | n/a       |
| PB                     | CD41a                   | Biolegend         | 303714         | HIP8      |
| PB                     | CD3                     | Biolegend         | 300330         | HIT3a     |
| BV605                  | CD45                    | Biolegend         | 304042         | HI30      |
| BV650                  | CD63                    | Biolegend         | 353026         | H5C6      |
| PER CP CY 5.5          | CD16                    | Biolegend         | 302028         | 3G8       |
| PE                     | CD66b                   | Biolegend         | 305106         | G10F5     |
| PE CY7                 | CD115                   | Biolegend         | 347308         | 9-4D2-1E4 |
| AF700                  | Siglec-8                | R&D Systems       | FAB7975N       | 837535    |
| <b><u>Panel 14</u></b> |                         |                   |                |           |
| FITC                   | NE                      | R&D Systems       | IC91671G-100UG | 950317    |
| APC                    | CD36                    | Biolegend         | 336208         | 5-271     |
| APC CY7                | CD304                   | Biolegend         | 354524         | 12C2      |
| <b><u>Panel 15</u></b> |                         |                   |                |           |
| FITC                   | PD-1                    | Biolegend         | 329904         | EH12.2H7  |
| APC                    | PD-L1                   | Biolegend         | 329708         | 29E.2A3   |
| APC CY7                | EGFR (unconjugated)     | Biolegend         | 352902         | AY13      |
|                        | APC Cy7 conjugation kit | Novus Biologicals | 765-0010       | n/a       |

**Table S4. Expanded demographics.** Abbreviations: W, White; F, Female; M, Male; MSSA, methicillin-susceptible *S. aureus*; MRSA, methicillin-resistant *S. aureus*.

| Subject #   | PE status  | Age (months) | Sex | Race/ Ethnicity | Mutation 1 | Mutation 2   | Bacterial infection  | Viral infection             |
|-------------|------------|--------------|-----|-----------------|------------|--------------|----------------------|-----------------------------|
| 1           | No PE      | 33           | M   | W               | F508del    | E585X        | MSSA                 |                             |
| 1, visit 2  | No PE      | 45           | M   | W               | F508del    | E585X        | MSSA                 |                             |
| 1, visit 3  | No PE      | 65           | M   | W               | F508del    | E585X        | MSSA                 |                             |
| 2           | No PE      | 26           | M   | W               | F508del    | F508del      | MSSA                 |                             |
| 2, visit 2  | No PE      | 40           | M   | W               | F508del    | F508 del     |                      |                             |
| 2, visit 3  | No PE      | 58           | M   | W               | F508del    | F508 del     |                      |                             |
| 3           | No PE      | 35           | F   | W               | F508del    | F508del      |                      |                             |
| 4           | Prior PE   | 48           | M   | W               | F508del    | 1717-1 G>A   | <i>S. marcescens</i> |                             |
| 5           | Prior PE   | 35           | M   | W               | F508del    | R553X        |                      |                             |
| 6           | Current PE | 102          | F   | W               | F508del    | F508del      | MRSA                 |                             |
| 7           | Current PE | 23           | M   | W               | F508del    | 621+1G>T     | MRSA                 | Parainfluenza 4 PCR         |
| 7, visit 2  | Current PE | 25           | M   | W               | F508del    | F508del      | MRSA                 | Rhinovirus, Influenza A PCR |
| 7, visit 3  | Prior PE   | 27           | M   | W               | F508del    | F508del      | MRSA                 |                             |
| 8           | Current PE | 17           | M   | W               | F508del    | F508del      | MRSA                 |                             |
| 9           | No PE      | 15           | F   | W               | F508del    | F508del      |                      |                             |
| 10          | No PE      | 16           | M   | W               | F508del    | F508del      | MSSA                 |                             |
| 11          | No PE      | 36           | F   | W               | F508del    | 5T with TG11 | MRSA                 |                             |
| 11, visit 2 | No PE      | 49           | F   | W               | F508del    | 5T with TG11 |                      |                             |
| 11, visit 3 | No PE      | 64           | F   | W               | F508del    | 5T with TG11 | MRSA                 |                             |
| 12          | Prior PE   | 75           | F   | W               | M1101K     | 2789 +5G>A   |                      |                             |
| 13          | Prior PE   | 25           | M   | Mixed           | 3120+1 G>A | c.3468+2dupT |                      |                             |
| 13, visit 2 | Prior PE   | 30           | M   | Mixed           | 3120+1 G>A | c.3468+2dupT |                      |                             |

|                    |            |    |   |        |            |                     |      |            |
|--------------------|------------|----|---|--------|------------|---------------------|------|------------|
| <b>13, visit 3</b> | Prior PE   | 35 | M | Mixed  | 3120+1 G>A | c.3468+2dupT        | MSSA |            |
| <b>14</b>          | Prior PE   | 68 | M | W      | F508del    | 1898+1G>A           | MSSA |            |
| <b>15</b>          | Current PE | 61 | M | W      | F508del    | F508del             |      |            |
| <b>16</b>          | No PE      | 51 | F | Latina | F508del    | D1152H              | MSSA |            |
| <b>17</b>          | Current PE | 53 | M | W      | F508del    | 621+1G>T            | MSSA |            |
| <b>17, visit 2</b> | Current PE | 61 | M | W      | F508del    | 621+1G>T            | MSSA | Rhinovirus |
| <b>18</b>          | No PE      | 26 | F | W      | F508del    | F508del             | MSSA |            |
| <b>18, visit 2</b> | No PE      | 44 | F | W      | F508del    | F508 del            |      |            |
| <b>19</b>          | Current PE | 10 | M | W      | F508del    | F508del             |      |            |
| <b>20</b>          | Prior PE   | 70 | F | W      | F508del    | F508del             |      |            |
| <b>21</b>          | No PE      | 77 | M | W      | F508del    | 1898+1G>A           |      |            |
| <b>22</b>          | No PE      | 23 | M | W      | G542X      | c.del_exon25_exon26 |      |            |
| <b>23</b>          | Prior PE   | 28 | M | W      | F508del    | F508 del            |      |            |
| <b>23, visit 2</b> | Prior PE   | 50 | M | W      | F508del    | F508 del            | MRSA |            |
| <b>24</b>          | Prior PE   | 31 | M | W      | F508del    | R553X               |      |            |
| <b>25</b>          | Prior PE   | 64 | M | W      | F508del    | 5T-TG13             | MRSA |            |
| <b>26</b>          | No PE      | 83 | M | W      | F508del    | 2789+2insA          |      |            |



## Supplementary Figures

### Figure S1. Dot plot representation of infection status and neutrophil frequency in BAL.

Infection and airway neutrophil frequency data from Table 2 is shown with one dot corresponding to one subject.

**Figure S2. Flow cytometry gating strategy.** Cells from blood and BAL were stained for analysis by flow cytometry (representative sample shown here for illustrative purposes). All major cell populations in both sample types were identified by gating in Flowjo. (A) The same upstream gates were applied to all blood and BAL samples beginning with a time gate to exclude air bubbles or other errors with sample acquisition. Debris and red blood cells were excluded by gating on CD45<sup>+</sup> events. Single cells were identified using forward scatter-area and forward scatter-height. After gating on live cells, individual cell populations could then be identified. (B) In blood, platelet-free eosinophil and neutrophil populations were selected by gating on CD41a<sup>+</sup> events. Among platelet-free neutrophils, the A1 and A2 (GRIM) subpopulations were identified using CD16 and CD63. Among PBMCs, monocytes were gated on as CD115<sup>+</sup> and having higher side scatter. Platelet-free monocytes were then selected. Platelet-free T cells and CD16<sup>+</sup> NK cells were gated from the lymphocyte population. (C) Following the live gate in BAL samples, CD66b and CD45 were used for gating on neutrophils, while CD66b and CD115 were applied for macrophages and lymphocytes followed by additional gating steps. Neutrophils were again divided into the A1 and A2 (GRIM) subpopulations, while T cells were selected from CD115<sup>low</sup> events following identification of the airway monocyte/macrophage population.

**Figure S3. T cells downregulate CD45 and PD-L1 during PEs.** Surface expression of CD45 and PD-L1 on T cells from blood and BAL was measured by flow cytometry and reported as median fluorescence intensity (MFI). Comparisons between blood (n = 26 for CD45 and n = 24 for PD-L1) and BAL (n = 15 for CD45 and PD-L1) used the Mann-Whitney test. No PE, prior PE, and current PE groups were compared by the Mann-Whitney test. CD45: n = 11, 10, and 5 for no PE, prior PE, and current PE groups in blood and n = 6, 5, and 4 for no PE, prior PE, and current PE groups in BAL, respectively. PD-L1: n = 11, 9, and 4 for no PE, prior PE, and current PE groups in blood and n = 6, 5, and 4 for no PE, prior PE, and current PE groups in BAL, respectively. \*p ≤ 0.05, \*\*p ≤ 0.01, and \*\*\*\*p ≤ 0.0001.
